# Supplementary material
Source: publisher figshare collection journal article supplement (https://karger.figshare.com/ndownloader/files/30750334)
Supplement: Supplementary file 1 [file 30750334]

**Table S1.** **Composition of formulated milk.**

| **Ingredients (%)** |  | **Nutrients** |  |
| --- | --- | --- | --- |
| Whey protein concentrate | 35.00 | Crude protein (%) | 45.65 |
| Goat whole milk powder | 22.50 | Crude fat (%) | 22.72 |
| Whole buffalo milk powder | 22.50 | Lactose (%) | 17.95 |
| Whole egg powder | 10.00 | Ca (%) | 1.00 |
| Soy protein isolate | 2.00 | P (%) | 0.70 |
| Choline chloride | 2.00 | Lys/Crude protein | 6.50 |
| Ca(H2PO4)2 | 1.00 | Thr/Crude protein | 6.50 |
| Glucose | 0.98 | Arg/Crude protein | 7.00 |
| Calcium formate | 0.50 |  |  |
| NaCl | 0.50 |  |  |
| Lys | 0.80 |  |  |
| Thr | 0.80 |  |  |
| Arg | 0.80 |  |  |
| Compound trace elements1 | 0.50 |  |  |
| Compound multivitamins2 | 0.10 |  |  |
| Compound enzyme preparation2 | 0.02 |  |  |

1Provided per kg of compound trace elements: Fe 75 mg, Cu 12 mg, Zn 75 mg, Mn 20 mg, Se 0.2 mg, Co 0.2, I 0.65 mg; 2Provided per kg of compound multivitamins: VA 8000 IU/kg, VD 1200 IU, VE 65 mg; 3Provided per g of compound enzyme preparation: neutral protease 7500 U, acid protease 7500 U, α-amylase 200 U.
